# Supplementary material
Source: PubMed Central journal article supplement (PMC7326410)
Supplement: mmc1.pdf [file mmc1.pdf]

**Cell Reports, Volume 31**

**Supplemental Information**

**Landscape of Non-canonical Cysteines in Human V<sub>H</sub>  
Repertoire Revealed by Immunogenetic Analysis**

**Ponraj Prabakaran and Partha S. Chowdhury**

## **Supplemental Information**

### **Immunogenetic Analysis Reveals the Landscape of Non-Canonical Cysteines in Human V<sub>H</sub> repertoire**

Ponraj Prabakaran and Partha S. Chowdhury

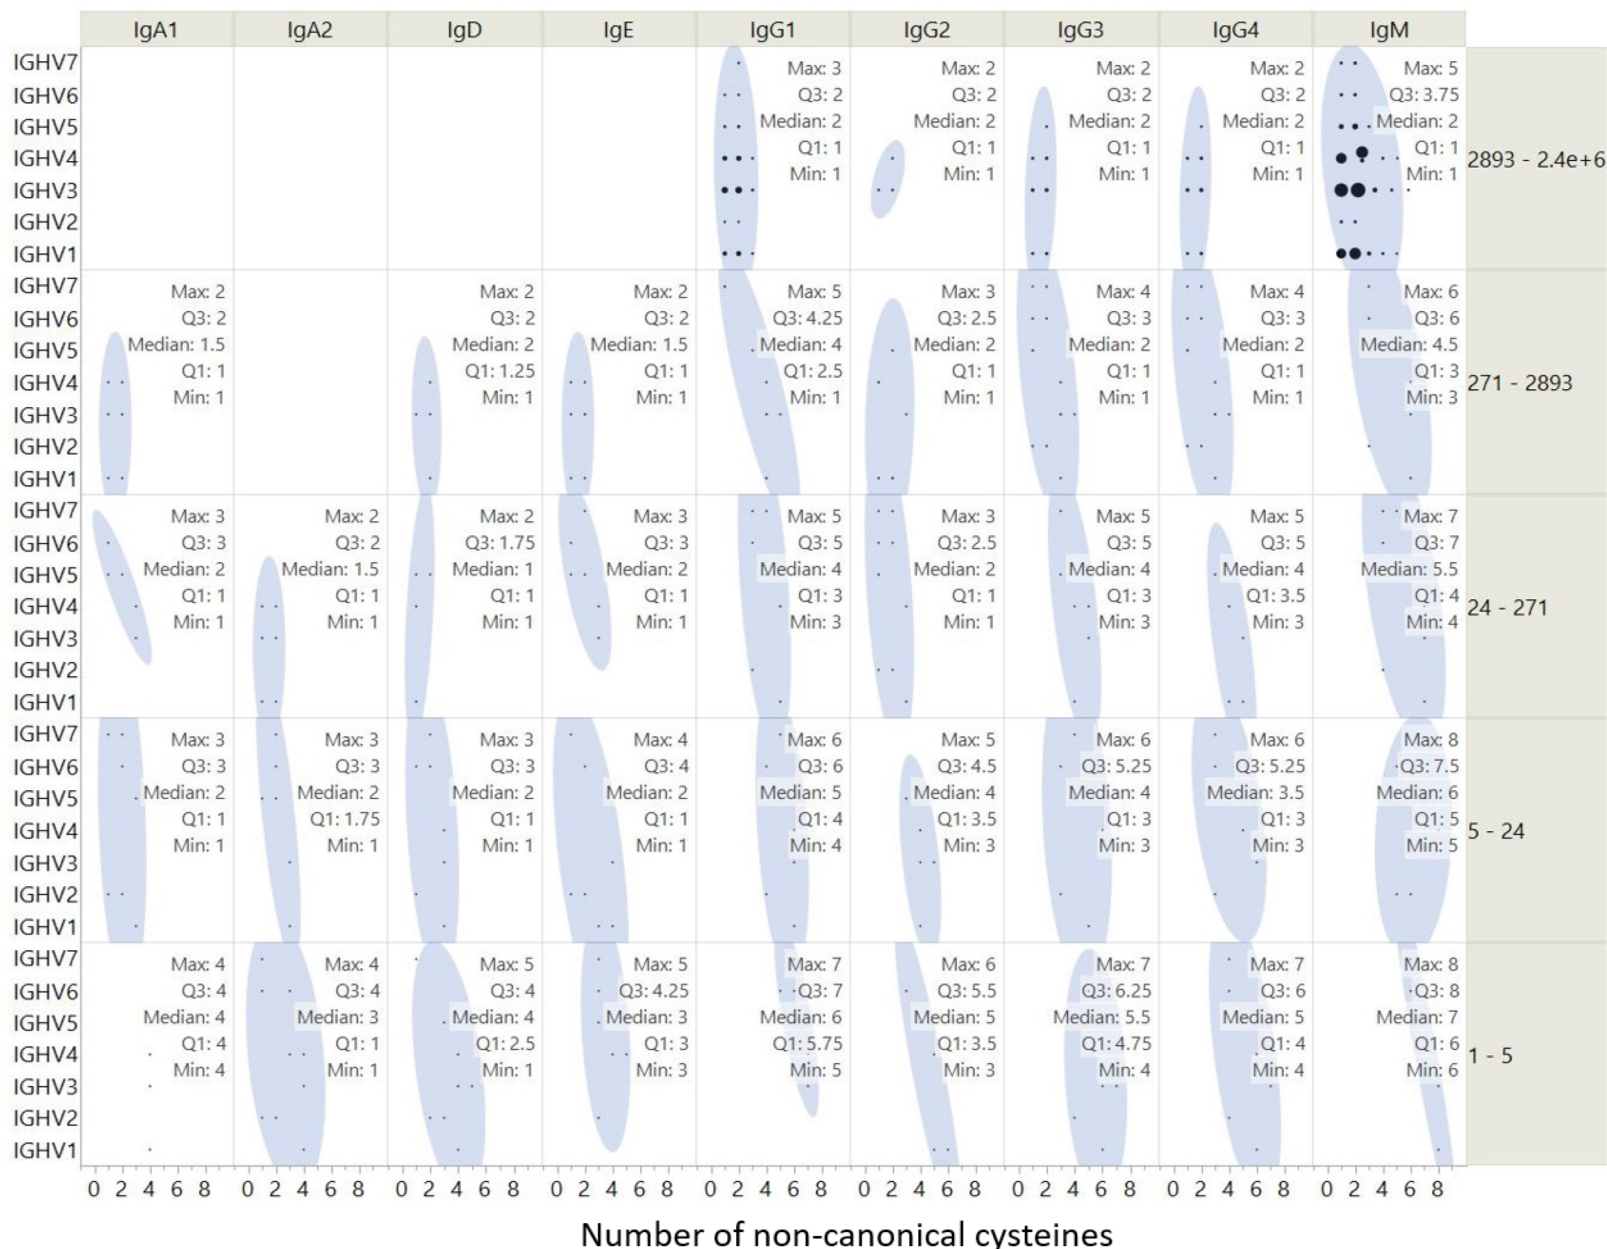

**Figure S1. Bivariate normal density plot showing the association of non-canonical cysteine containing human CDR-H3s with different IGHV gene families and isotypes, Related to Figure 1, Table S1 and RESULTS section: Immunogenetic Analysis Reveals High Frequency, Extensive Diversity and Recurring Patterns of Non-Canonical Cysteines**

IGHV gene usage and Ig isotype diversity observed in 12,054,263 human VH sequences from dataset A are shown by bivariate normal density plots with a 90% coverage along with statistical summary. Total counts are shown on the right side.

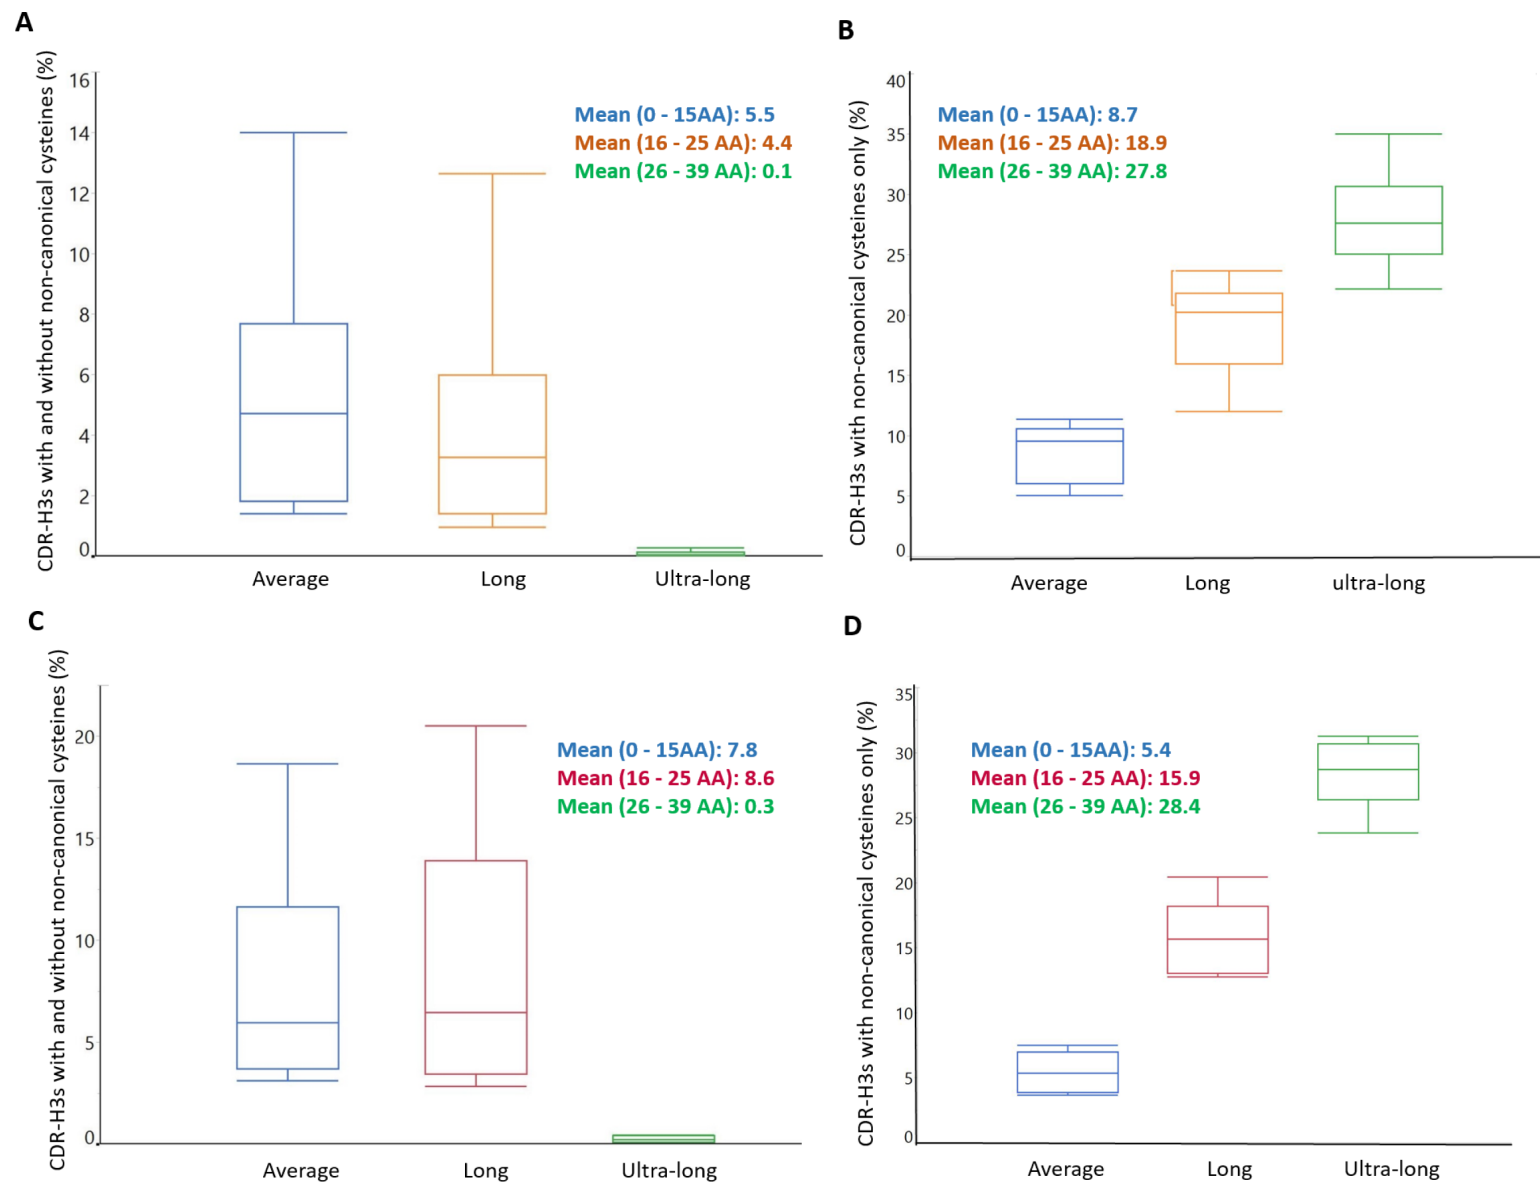

**Figure S2. Box plots showing percentages of antibodies that were grouped into three different CDR-H3 length categories, average (up to 15 AA), long (16-25 AA) and ultra-long (26-39 AA), Related to Figure 1B and Tables S1 and S2**

(A and B) The percentage of antibodies of different CDR-H3 length categories for dataset A in all sequences, with and without non-canonical cysteines, (A) and in non-canonical cysteine containing CDR-H3s only (B).

(C and D) The percentage of antibodies of different CDR-H3 length categories for dataset B in all sequences, with and without non-canonical cysteines, (C) and in non-canonical cysteine containing CDR-H3s only (D).



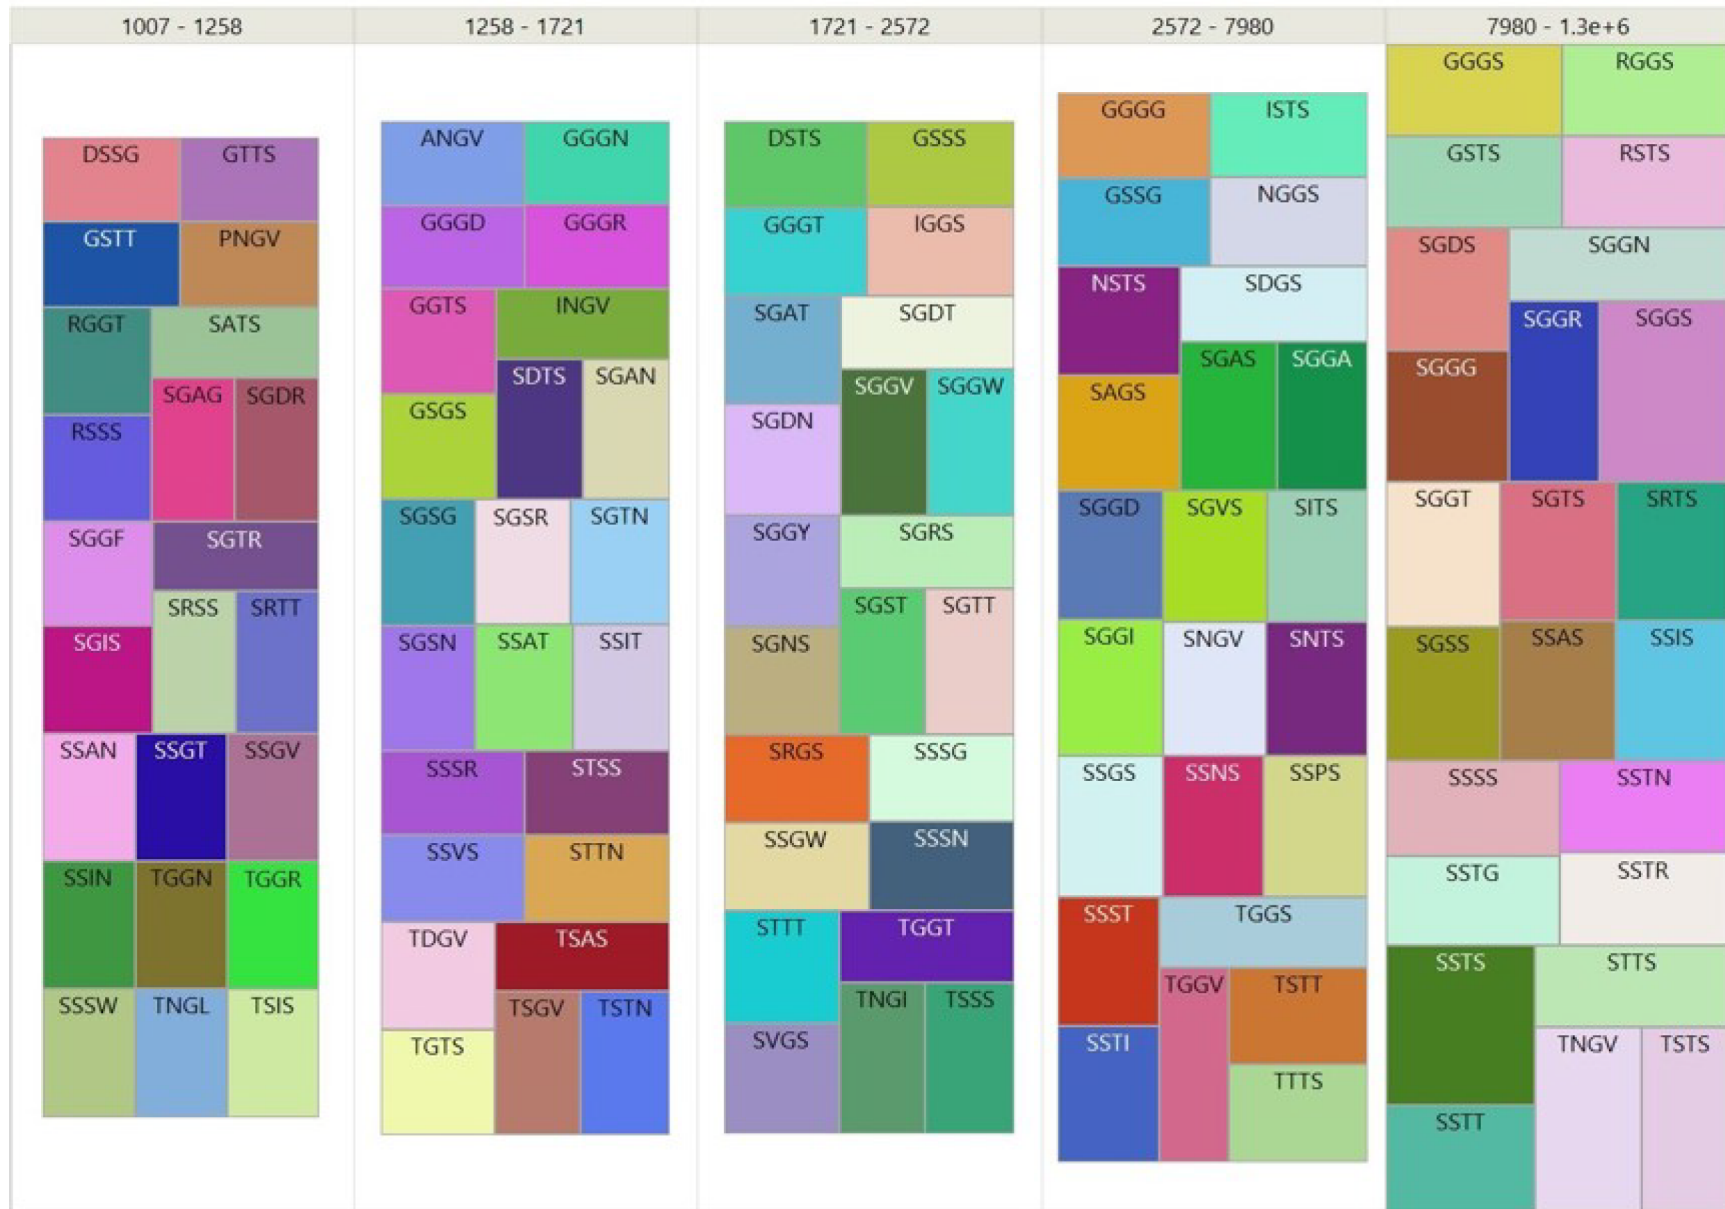

**Figure S3, Related to Figure 4**

Treemapping of 118 high-frequency tetrapeptides within CX<sub>4</sub>C motifs of human CDR-H3s appearing more than 1000 times, as observed in dataset A, is shown with frequencies at the top.

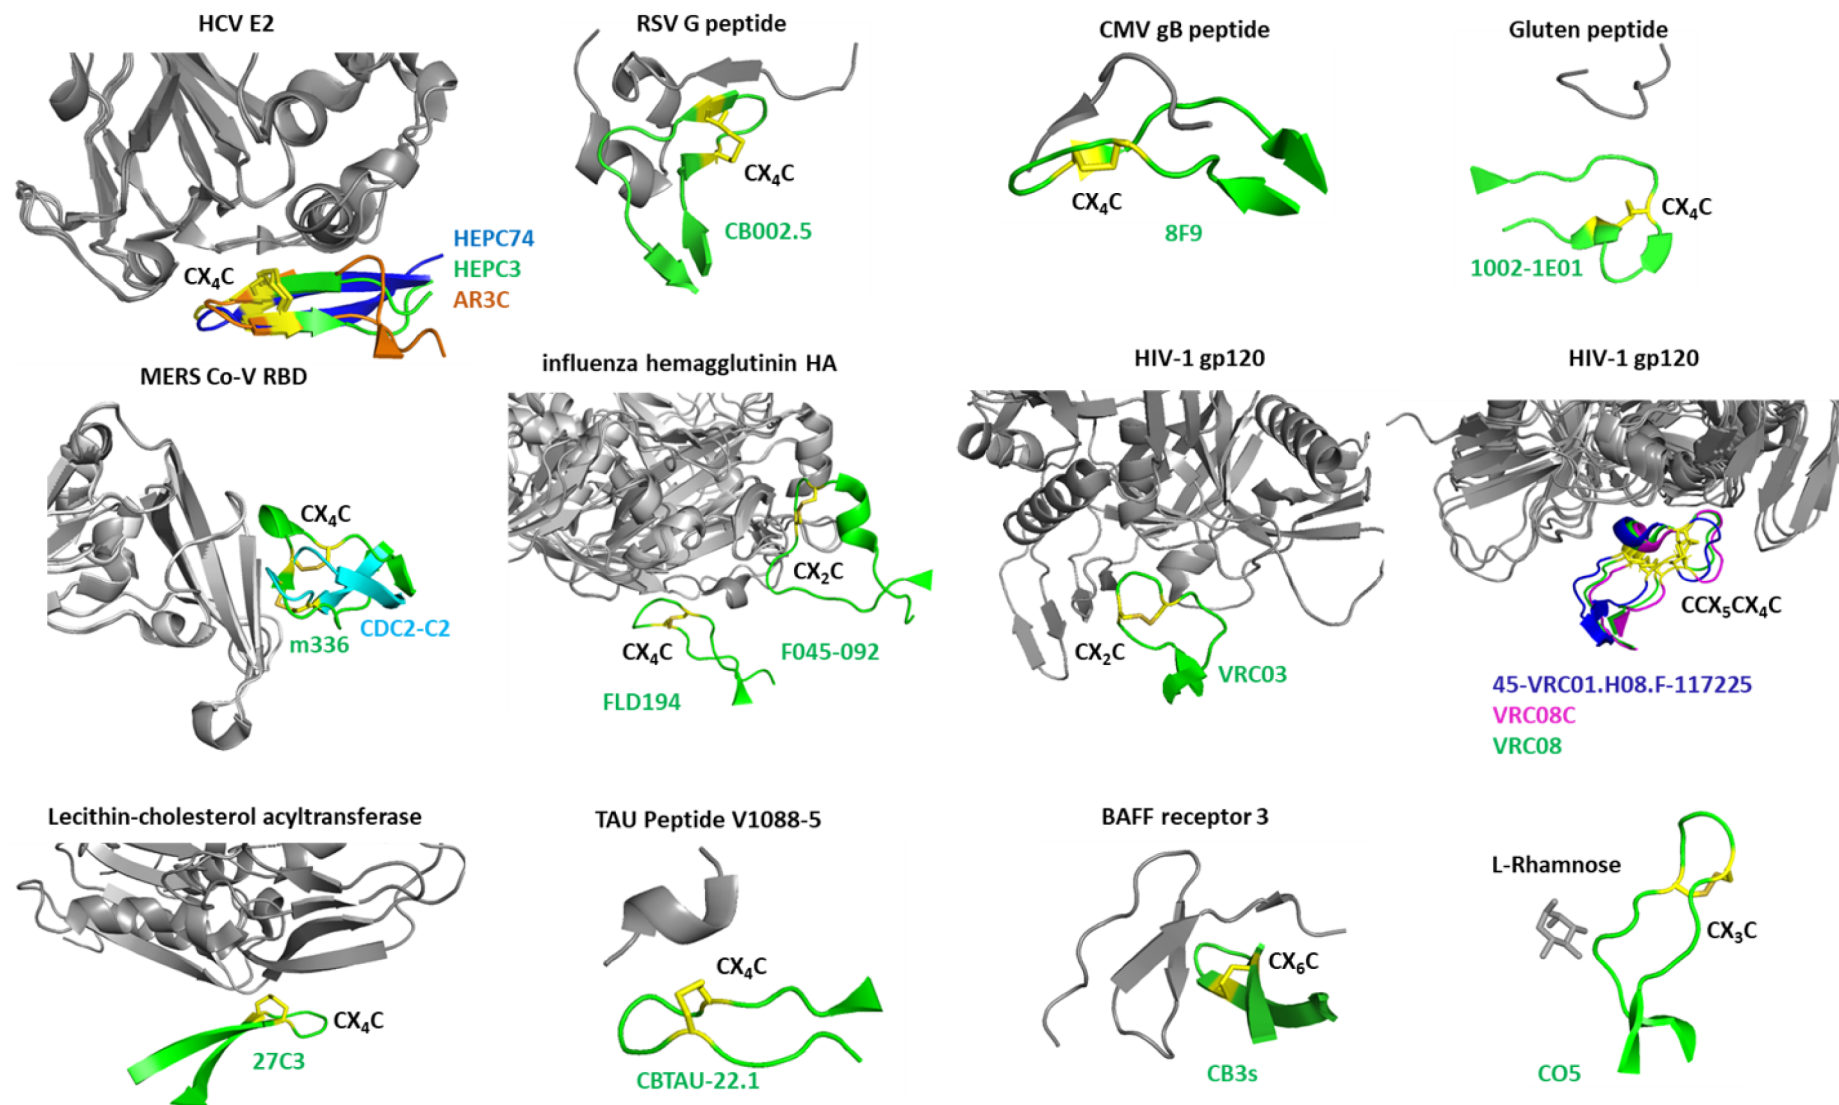

**Figure S4. Structurally known disulfide-bonded motifs in CDR-H3s of human antibodies in complex with diverse anti-viral and other antigens, Related to Figure 3A and Results section: CX<sub>n</sub>C Motifs Play a Determining Role in the Structure and Function of Antibodies**

Complex crystal structures showing the CDR-H3s (in colors) with intra-disulfide bonded motifs (yellow) in human antibodies targeting different antigens (gray) as found in the Protein Data Bank (PDB). CDR-H3s of antibodies with disulfide-bonded motifs recognizing different antigens are only shown. While CX<sub>4</sub>C motif is found widespread in CDR-H3s, other motifs of types CX<sub>2</sub>C, CX<sub>3</sub>C, CCX<sub>5</sub>CX<sub>4</sub>C and CX<sub>6</sub>C were also observed. See Figure S5 for more information on these and other uncomplexed antibodies containing disulfide-bonded cysteine motifs in CDR-H3s.



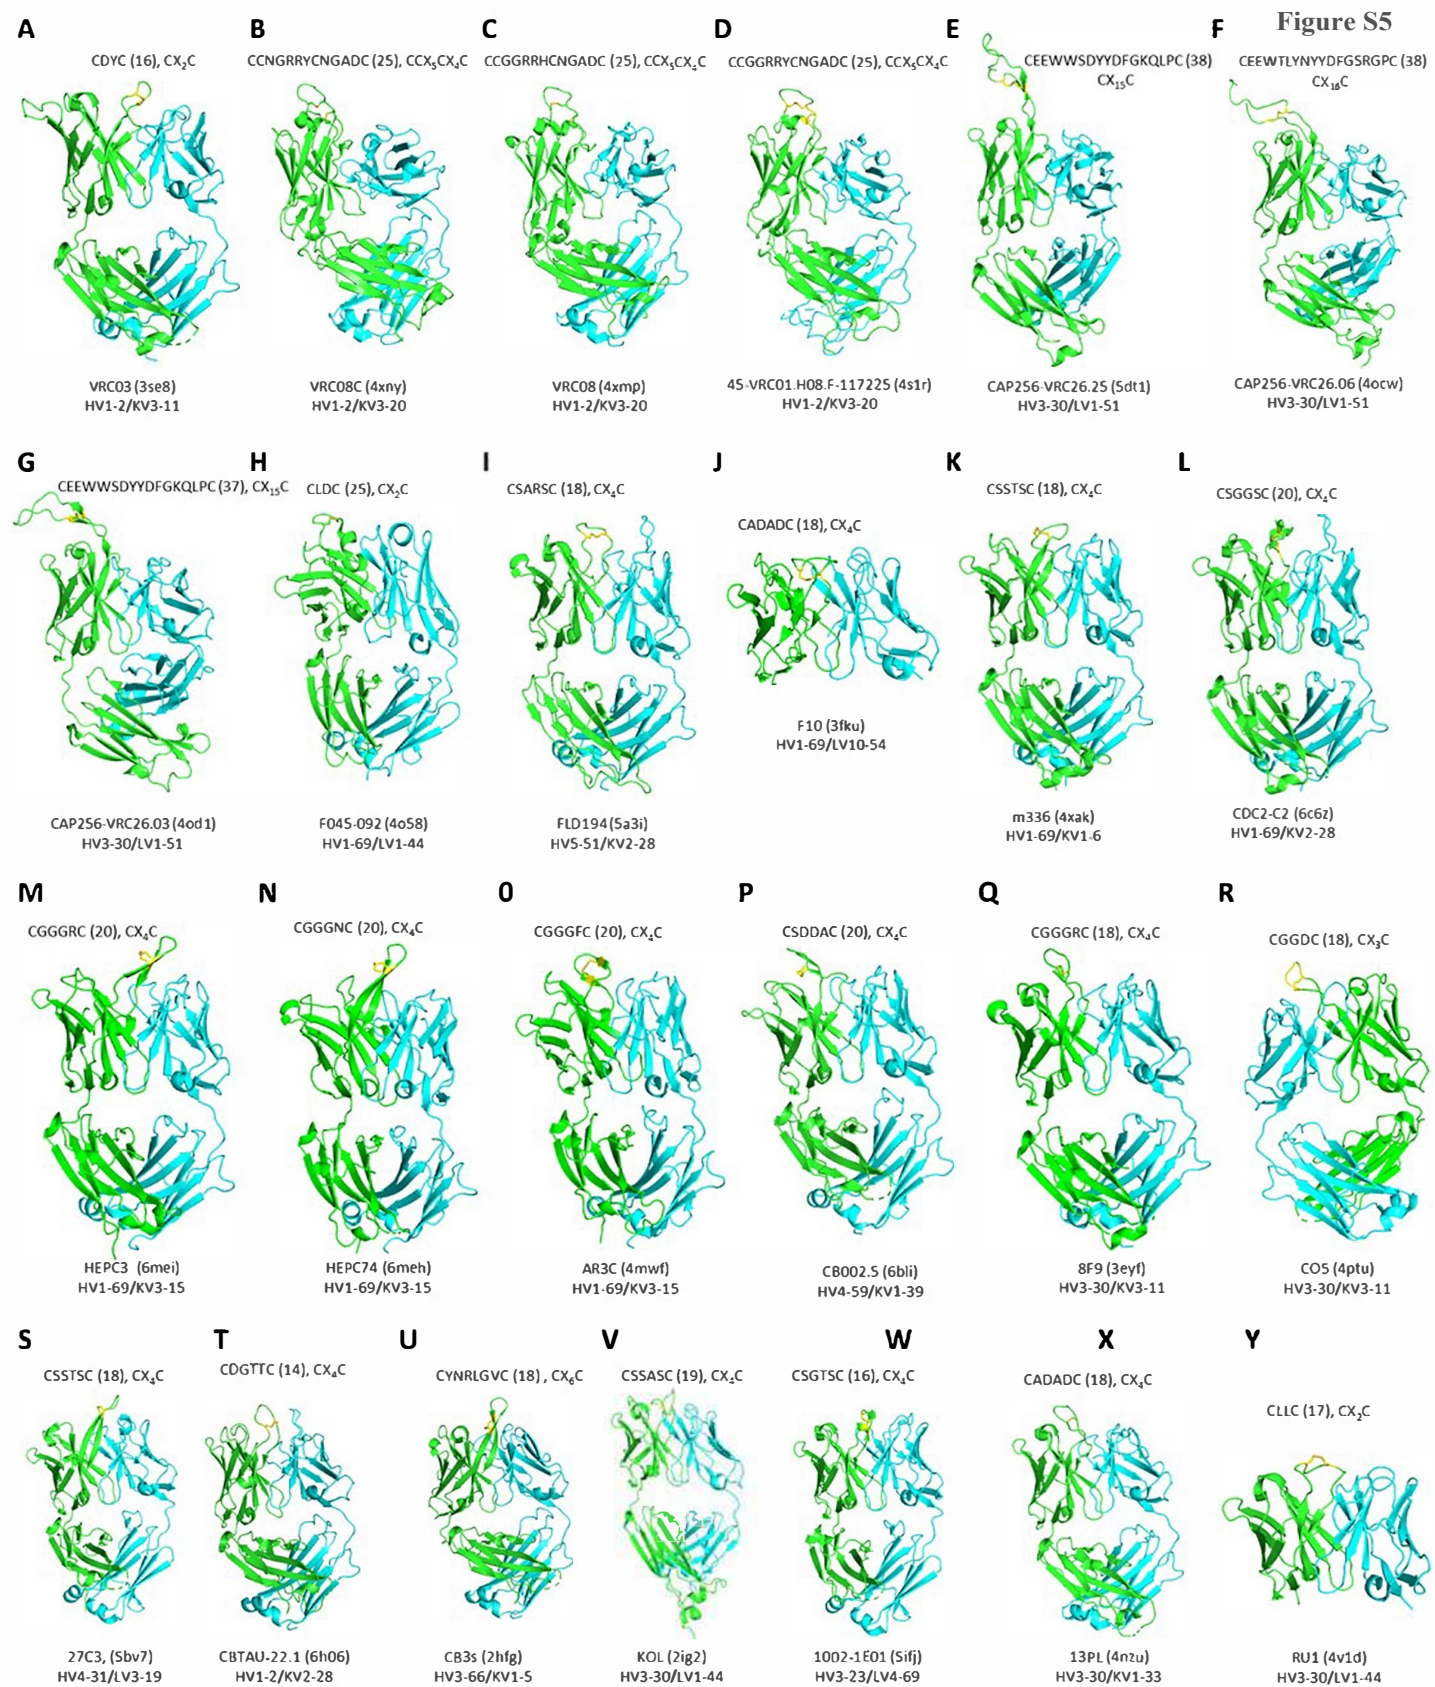

**Figure S5, Related to Figures 3A and S4, and Results section: CXnC Motifs Play a Determining Role in the Structure and Function of Antibodies**

Twenty-five human antibodies bearing a variety of disulfide-bonded CDR-H3s with distinctive IGHV/IGLV germline pairings, as analyzed from crystal structures available in the Protein Data Bank (PDB), are shown. These antibodies have longer CDR-H3s with lengths ranging from 16 to 38 AAs by IMGT numbering scheme. Heavy chains are in green, light chains in cyan and disulfide bonds in yellow. The sequence and type of cysteine motif along with CDR-H3 length are given at the top of each structure. Antibody name, PDB code and IGHV/IGLV germline information are given at the bottom of each structure. These antibodies target a wide range of antigens; (A-G) HIV, (H-J) Influenza, (K and L) MERS CoV, (M-O) HCV, (P) RSV, (Q) HCMV, (R) L-rhamnose of *Streptococcus pneumoniae*, (S) Lecithin cholesterol acyltransferase (LCAT), (T) Tau peptide, (U) BLYS receptor 3 (BR3), (V) Unknown, (W) Celiac disease-specific gluten peptide, (X) Protein M, (Y) Cn2 toxin from scorpion.

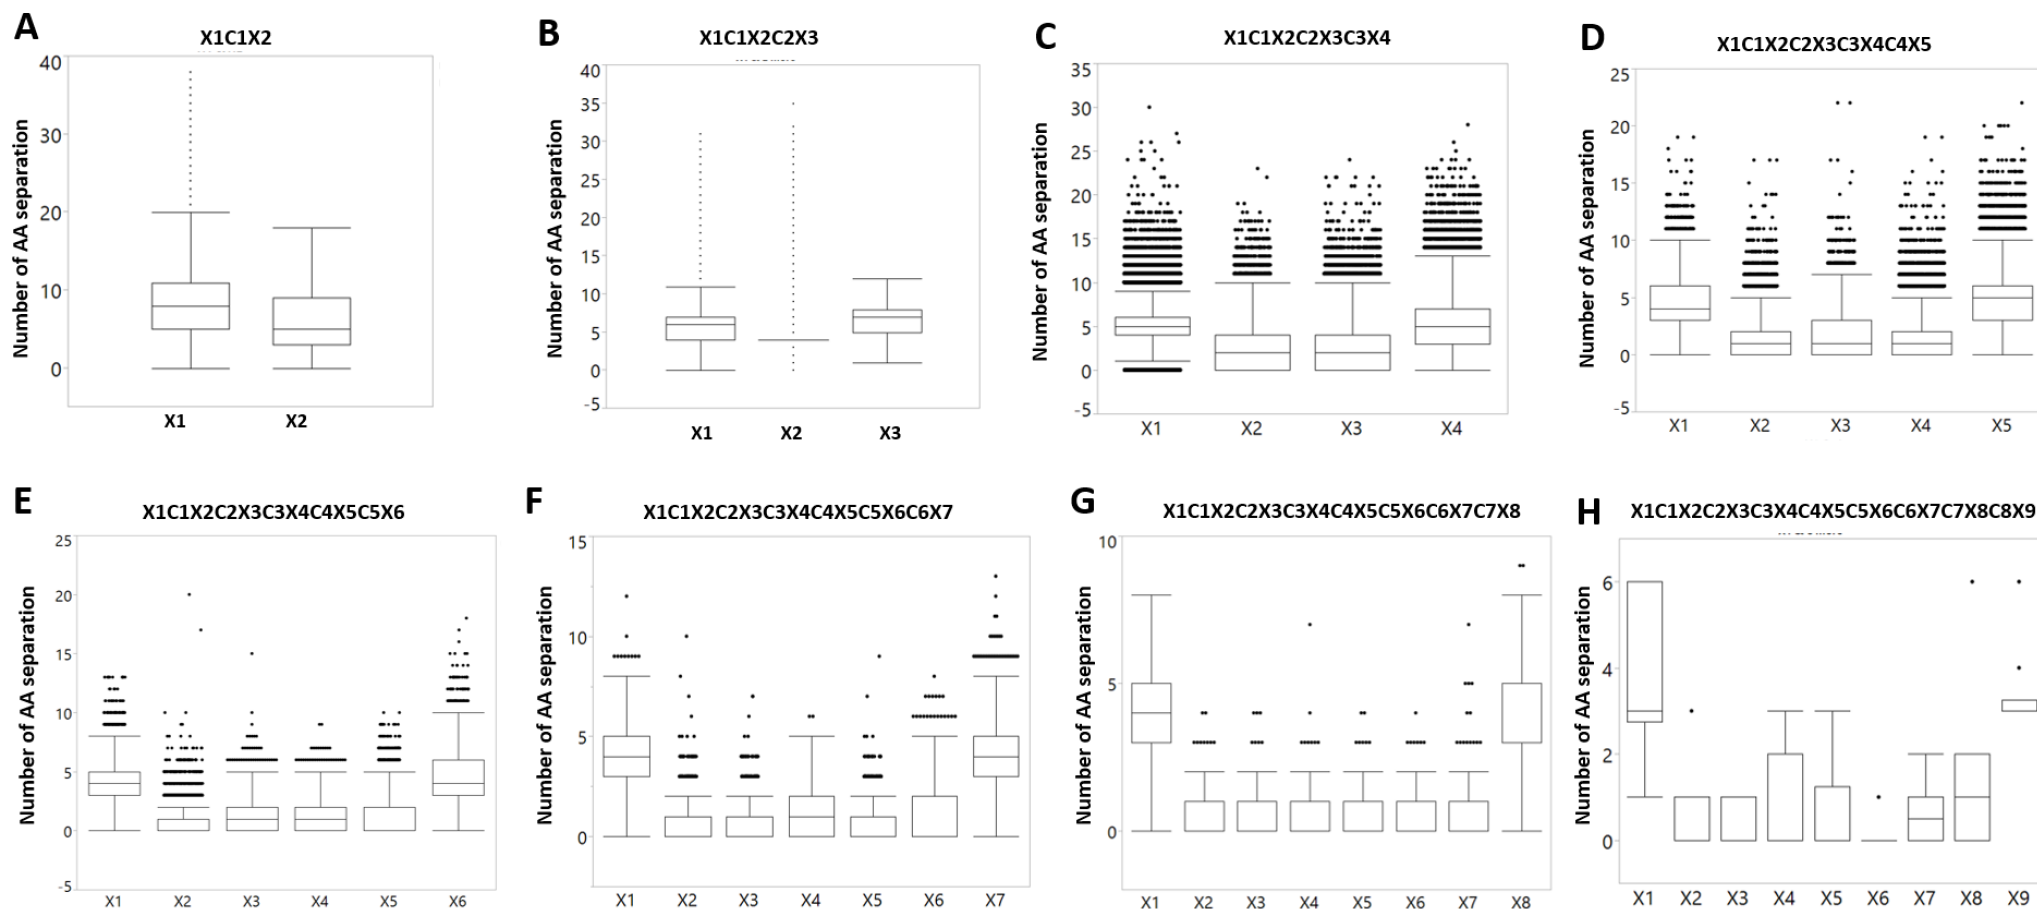

**Figure S6. Boxplots showing the variations in number of AAs separating and/or flanking the cysteines in human CDR-H3s, Related to Figure 1C**

(A-H) Distributions of number of AA separating and/or flanking the non-canonical cysteines observed in 8,792,995 unique CDR-H3s from dataset A. The cysteine motifs consisting of one to eight cysteines, as designated with C1 through C8 for cysteines and X1 through X9 for number of other AAs, are shown.

**(A)**

| D-D fusion                   | IGHD6-13*01<br>CC | IGHD2-21*01/*02<br>CGGDC | IGHD2-2*01/*02/*03<br>CSSTSC | IGHD2-15*01<br>CSGGSC | IGHD2-8*01<br>CTNGVC | IGHD2-8*02<br>CTGGVC |
|------------------------------|-------------------|--------------------------|------------------------------|-----------------------|----------------------|----------------------|
| IGHD6-13*01<br>CC            | 15815             | X                        | X                            | X                     | X                    | X                    |
| IGHD2-21*01/*02<br>CGGDC     | 349               | 7                        | X                            | X                     | X                    | X                    |
| IGHD2-2*01/*02/*03<br>CSSTSC | 556               | 218                      | 3                            | X                     | X                    | X                    |
| IGHD2-15*01<br>CSGGSC        | 545               | 149                      | 584                          | 13                    | X                    | X                    |
| IGHD2-8*01<br>CTNGVC         | 64                | 14                       | 127                          | 0                     | 1                    | X                    |
| IGHD2-8*02<br>CTGGVC         | 3                 | 1                        | 2                            | 0                     | 0                    | 0                    |

**(B)**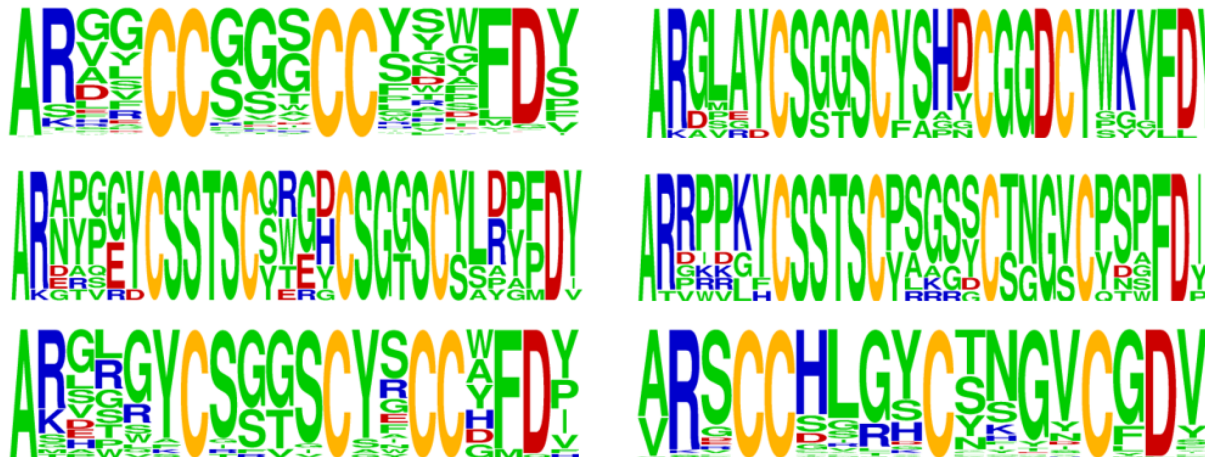

**Figure S7. The D-D fusions occurring in four cysteine motifs of human CDR-H3s, Related to Figure 7 and Results Sections: Multiple Non-Canonical Cysteine Motifs Exist and Reveal Immunogenetic Mechanisms**

(A) IGHV germline segments encoding two-cysteine motifs (CC, CX<sub>3</sub>C, CX<sub>4</sub>C) that could potentially undergo the V(DD)J recombination to create the four-cysteine motifs. Possible frequencies for the D-D fusions which might have occurred in the CDR-H3s were shown using the dataset A. Note that the total number of actual frequencies for such V(DD)J recombination with other IGHV germlines, with possible cysteines generated through SHM, could tremendously increase the four-cysteines motif landscape.

(B) WebLogos depicting the selected D-D fusions in several human CDR-H3s containing the four-cysteine motifs (dataset A).

| Subject | Number of non-canonical cysteines in human CDR-H3 sequences |               |                |              |              |                |                |               |              |  |
|---------|-------------------------------------------------------------|---------------|----------------|--------------|--------------|----------------|----------------|---------------|--------------|--|
|         | 0                                                           | 1             | 2              | 3            | 4            | 5              | 6              | 7             | 8            |  |
| 316188  | 2185008 (85.47)                                             | 174276 (6.82) | 181338 (7.09)  | 13471 (0.53) | 1897 (0.07)  | 280 (0.01)     | 43 (1.68E-03)  | 3 (1.17E-04)  | 0 (0)        |  |
| 326650  | 7914636 (87.80)                                             | 481991 (5.35) | 565310 (6.27)  | 40526 (0.45) | 9499 (0.11)  | 1636 (0.02)    | 260 (2.88E-03) | 29 (3.22E-04) | 2 (2.22E-05) |  |
| 326651  | 26227370 (91.49)                                            | 990083 (3.45) | 1395725 (4.87) | 45592 (0.16) | 7549 (0.03)  | 880 (3.07E-03) | 126 (4.40E-04) | 16 (5.58E-05) | 0 (0)        |  |
| 326713  | 23351663 (90.35)                                            | 780943 (3.02) | 1667752 (6.45) | 39706 (0.15) | 5172 (0.02)  | 419 (1.62E-03) | 44 (1.70E-04)  | 5 (1.93E-05)  | 0 (0)        |  |
| 326737  | 4035270 (83.32)                                             | 378073 (7.81) | 377441 (7.79)  | 41739 (0.86) | 8779 (0.18)  | 1500 (0.03)    | 232 (4.79E-03) | 19 (3.92E-04) | 0 (0)        |  |
| 326780  | 8047611 (85.85)                                             | 657353 (7.01) | 613643 (6.55)  | 46654 (0.50) | 7287 (0.08)  | 1065 (0.01)    | 127 (1.36E-03) | 8 (8.53E-05)  | 2 (2.13E-05) |  |
| 326797  | 7994539 (85.75)                                             | 642986 (6.90) | 611079 (6.55)  | 58458 (0.63) | 13318 (0.14) | 2548 (0.03)    | 366 (3.93E-03) | 28 (3.00E-04) | 2 (2.15E-05) |  |
| 326907  | 3022698 (84.55)                                             | 262663 (7.35) | 256224 (7.17)  | 26413 (0.74) | 5902 (0.17)  | 1097 (0.03)    | 153 (4.28E-03) | 24 (6.71E-04) | 2 (5.59E-05) |  |
| 327059  | 8999419 (88.77)                                             | 413974 (4.08) | 694609 (6.85)  | 25286 (0.25) | 3638 (0.04)  | 385 (3.80E-03) | 53 (5.23E-04)  | 9 (8.88E-05)  | 1 (9.86E-06) |  |
| D103    | 2688546 (84.41)                                             | 202902 (6.37) | 267718 (8.41)  | 21248 (0.67) | 3956 (0.12)  | 630 (0.02)     | 89 (2.79E-03)  | 6 (1.88E-04)  | 1 (3.14E-05) |  |
| Total   | 94466760(88.68)                                             | 4985244(4.68) | 6630839(6.22)  | 359093(0.34) | 66997(0.06)  | 10440(0.01)    | 1493(1.40E-03) | 147(1.38E-04) | 10(9.39E-06) |  |

**Table S1, Related to Figure 1 and RESULTS section: Immunogenetic Analysis Reveals High Frequency, Extensive Diversity and Recurring Patterns of Non-Canonical Cysteines**

Analysis of non-canonical cysteines in human CDR-H3 repertoire. A total of 106,521,023 CDR-H3 sequences of NGS data sets from ten subjects (dataset A) were retrieved and analyzed. The data sets were binned by number of non-canonical cysteines, 0 to 8, as observed in the CDR-H3s for each subject. The numbers under each column represents the number of unique sequences and the numbers in parenthesis represent % of total.

| Subject | Number of non-canonical cysteines in human CDR-H3 sequences |               |                |              |             |               |              |              |
|---------|-------------------------------------------------------------|---------------|----------------|--------------|-------------|---------------|--------------|--------------|
|         | 0                                                           | 1             | 2              | 3            | 4           | 5             | 6            | 7            |
| D1-N    | 10675006 (91.15)                                            | 211470 (1.81) | 818166 (6.99)  | 5360 (0.05)  | 950 (0.01)  | 7 (5.98E-05)  | 0 (0.00)     | 0 (0.00)     |
| D1-M    | 1998200 (88.66)                                             | 93356 (4.14)  | 158145 (7.02)  | 3656 (0.16)  | 303 (0.01)  | 5 (2.22E-04)  | 0 (0.00)     | 1 (4.44E-05) |
| D2-N    | 3997111 (90.90)                                             | 86873 (1.98)  | 310621 (7.06)  | 2366 (0.05)  | 513 (0.01)  | 3 (6.82E-05)  | 2 (4.55E-05) | 0 (0.00)     |
| D2-M    | 1576510 (87.83)                                             | 74297 (4.14)  | 140679 (7.84)  | 3033 (0.17)  | 343 (0.02)  | 5 (2.79E-04)  | 0 (0.00)     | 0 (0.00)     |
| D3-N    | 5659708 (89.34)                                             | 130189 (2.06) | 539685 (8.52)  | 4571 (0.07)  | 907 (0.01)  | 5 (7.89E-05)  | 0 (0.00)     | 0 (0.00)     |
| D3-M    | 2646855 (85.90)                                             | 123920 (4.02) | 303136 (9.84)  | 6766 (0.22)  | 536 (0.02)  | 13 (4.22E-04) | 1 (3.25E-05) | 0 (0.00)     |
| Total   | 26553390 (89.79)                                            | 720105 (2.43) | 2270432 (7.68) | 25752 (0.09) | 3552 (0.01) | 38 (1.28E-04) | 3 (1.01E-05) | 1 (3.38E-06) |

**Table S2, Related to Figure S2C and D, and RESULTS section: Immunogenetic Analysis Reveals High Frequency, Extensive Diversity and Recurring Patterns of Non-Canonical Cysteines**

Non-canonical cysteines in human CDR-H3s of naïve (N) and memory (M) repertoires. The NGS data sets containing a total of 29,573,273 sequences from three subjects (dataset B) were analyzed. The data sets were binned by number of non-canonical cysteine residues, 0 to 7, as observed in the CDR-H3 sequences for each individual. The numbers under each column represents the number of unique sequences and the numbers in parenthesis represent % of total.



**(A)****(B)**

|                    |                                                                                                    |                    |                                                               |          |                       |       |                                  |      |
|--------------------|----------------------------------------------------------------------------------------------------|--------------------|---------------------------------------------------------------|----------|-----------------------|-------|----------------------------------|------|
| J00232 IGHD2-2*01  | R I L * * Y Q L L <u>C</u><br>G Y <u>C</u> S S T S <u>C</u> Y A<br>AGGATATTGTAGTAGTACCAGCTGCTATGCC | X97051 IGHD1-1*01  | R S S <u>C</u> T<br>GTCGTTCCAGTGTACC                          | IGHD     | Number of all CDR-H3s | (%)   | Number of Cys containing CDR-H3s | (%)  |
| X97051 IGHD2-2*02  | G Y <u>C</u> S S T S <u>C</u> Y T<br>AGGATATTGTAGTAGTACCAGCTGCTATACC                               | J00235 IGHD2-21*01 | G I A I T T T I <u>C</u><br>GGAATAGCAATCACCACCACAATATGCT      | IGHD1-1  | 1093660               | 1.03  | 47435                            | 0.04 |
| M35648 IGHD2-2*03  | W I L * * Y Q L L <u>C</u><br>G Y <u>C</u> S S T S <u>C</u> Y A<br>TGGATATTGTAGTAGTACCAGCTGCTATGCC | X97051 IGHD2-21*02 | G I A V T T T I <u>C</u><br>GGAATAGCAGTACCACCACAATATGCT       | IGHD1-20 | 257626                | 0.24  | 9892                             | 0.01 |
| X13972 IGHD2-8*01  | R I L Y * W <u>C</u> M L Y<br>G Y <u>C</u> T N G V <u>C</u> Y T<br>AGGATATTGTAATAATGGTGTATGCTATACC | X93618 IGHD3-3*02  | V * * P L Q K <u>C</u> * Y<br>GGTATAATAACCACTCCAAAAATGCTAATAC | IGHD1-26 | 6014104               | 5.65  | 239936                           | 0.23 |
| J00233 IGHD2-8*02  | R I L Y W W <u>C</u> M L Y<br>G Y <u>C</u> T G G V <u>C</u> Y T<br>AGGATATTGTAAGTGGTGTATGCTATACC   | X13972 IGHD4-4*01  | S Y <u>C</u> S<br>GTAGTTACTGTAGTCA                            | IGHD1-7  | 1275693               | 1.20  | 46841                            | 0.04 |
| J00234 IGHD2-15*01 | G Y <u>C</u> S G G S <u>C</u> Y S<br>AGGATATTGTAGTGGTGGTAGCTGCTACTCC                               | X13972 IGHD4-11*01 | S Y <u>C</u> S<br>GTAGTTACTGTAGTCA                            | IGHD2-15 | 5876364               | 5.52  | 2367365                          | 2.22 |
| J00235 IGHD2-21*01 | A Y <u>C</u> G G D <u>C</u> Y S<br>AGCATATTGTGGTGGTGATTGCTATTCC                                    | X13972 IGHD5-5*01  | N H S <u>C</u> I H<br>GTAACCATAGCTGTATCCAC                    | IGHD2-2  | 7810904               | 7.33  | 3995203                          | 3.75 |
| X97051 IGHD2-21*02 | A Y <u>C</u> G G D <u>C</u> Y S<br>AGCATATTGTGGTGGTGACTGCTATTCC                                    | X97051 IGHD5-18*01 | N H S <u>C</u> I H<br>GTAACCATAGCTGTATCCAC                    | IGHD2-21 | 4076340               | 3.83  | 1047839                          | 0.98 |
| X93615 IGHD3-10*02 | V L L <u>C</u> S G S Y Y N<br>GTATTACTATGTTCCGGGGAGTTATTATAAC                                      | X97051 IGHD5-24*01 | N <u>C</u> S H L Y<br>GTAATTGTAGCCATCTCTAC                    | IGHD2-8  | 2628608               | 2.47  | 482875                           | 0.45 |
| X93614 IGHD3-16*01 | V L * L R L G E L <u>C</u> L Y<br>GTATTATGATTACGTTGGGGGAGTTATGCTTATACC                             | X13972 IGHD6-6*01  | T S <u>C</u> Y T<br>GGACGAGCTGCTATACTC                        | IGHD3-10 | 13973853              | 13.12 | 687987                           | 0.65 |
|                    |                                                                                                    | X13972 IGHD6-13*01 | T S <u>C</u> <u>C</u> Y T<br>GTACCAGCTGCTGCTATACCC            | IGHD3-16 | 5001391               | 4.70  | 274312                           | 0.26 |
|                    |                                                                                                    | X97051 IGHD6-19*01 | T S H <u>C</u> Y T<br>GTACCAGCCACTGCTATACCC                   | IGHD3-22 | 11588386              | 10.88 | 743634                           | 0.70 |
|                    |                                                                                                    | X97051 IGHD6-25*01 | S R <u>C</u> Y T<br>GTAGCCGCTGCTATACCC                        | IGHD3-3  | 6999534               | 6.57  | 440238                           | 0.41 |
|                    |                                                                                                    |                    |                                                               | IGHD3-9  | 3926989               | 3.69  | 202020                           | 0.19 |
|                    |                                                                                                    |                    |                                                               | IGHD4-17 | 4777260               | 4.48  | 182354                           | 0.17 |
|                    |                                                                                                    |                    |                                                               | IGHD4-4  | 1019379               | 0.96  | 43275                            | 0.04 |
|                    |                                                                                                    |                    |                                                               | IGHD5-12 | 4327874               | 4.06  | 195328                           | 0.18 |
|                    |                                                                                                    |                    |                                                               | IGHD5-5  | 4570933               | 4.29  | 220258                           | 0.21 |
|                    |                                                                                                    |                    |                                                               | IGHD6-13 | 8481459               | 7.96  | 385882                           | 0.36 |
|                    |                                                                                                    |                    |                                                               | IGHD6-19 | 8328442               | 7.82  | 467849                           | 0.44 |
|                    |                                                                                                    |                    |                                                               | IGHD6-25 | 547368                | 0.51  | 26502                            | 0.02 |
|                    |                                                                                                    |                    |                                                               | IGHD6-6  | 2854008               | 2.68  | 115072                           | 0.11 |
|                    |                                                                                                    |                    |                                                               | IGHD7-27 | 1002322               | 0.94  | 27249                            | 0.03 |

**Table S3. IGHD gene segments in human V<sub>H</sub> repertoires, Related to Figure1 and RESULTS section: Immunogenetic Analysis Reveals High Frequency, Extensive Diversity and Recurring Patterns of Non-Canonical Cysteines**

(A) IGHD germline segments that encode cysteines with their corresponding accession numbers from the IMGT database. \* indicates a stop codon in the sequence.

(B) Total numbers of CDR-H3s as well as those that contain non-canonical cysteines involving different IGHD segments are given. IGHD2 segments encoding two cysteines (highlighted in gray) observed in human V<sub>H</sub> repertoire as seen in the dataset A.
